# Supplementary material
Source: publisher figshare collection journal article supplement (https://acs.figshare.com/ndownloader/files/4723183)
Supplement: Supplementary file 1 [file 4723183]

---

## Electrochemical Generation of Cationic Pd Catalysts and Pd/TEMPO Double-Mediatory Electrooxidative Wacker-type Reactions

Koichi Mitsudo,\* Takashi Kaide, Eriko Nakamoto, Kenta Yoshida, and Hideo Tanaka\*

*Division of Chemistry and Biochemistry, Graduate School of Natural Science and Technology,  
Okayama University, 3-1-1 Tsushima-Naka, Okayama 700-8530, Japan*

---

### 1. General

$^1\text{H}$  and  $^{13}\text{C}$  NMR spectra were recorded on Varian GEMINI 200 ( $^1\text{H}$  200 MHz,  $^{13}\text{C}$  50 MHz) spectrometer in  $\text{CD}_3\text{NO}_2$  or  $\text{CDCl}_3$  using TMS or residual solvent as internal standard. IR spectra were recorded on a JASCO FT/IR-4100 spectrophotometer. Unless otherwise noted, all reactions were performed under air. Unless otherwise noted, all materials were obtained from commercial suppliers and used without further purification. Dried acetonitrile ( $\text{CH}_3\text{CN}$ ) over  $\text{CaH}_2$  was used in the synthesis of palladium complexes. Unless otherwise noted, all reactions were performed under air.

### 2. General Procedure for Electrochemical Preparation of Cationic Palladium Complex

The anodic oxidation was carried out in an H-type divided cell (glass filter) equipped with two platinum electrodes ( $1.0 \times 1.5 \text{ cm}^2$ ). In the anodic chamber was placed a solution of  $\text{Pd}(\text{OAc})_2$  (22 mg, 0.1 mmol) in 0.2 M  $\text{Bu}_4\text{NBF}_4/\text{CH}_3\text{CN}$  (5.0 mL). In the cathodic chamber was placed 0.2 M  $\text{Bu}_4\text{NBF}_4/\text{CH}_3\text{CN}$  (5.0 mL). Under argon, the constant current electrolysis (10 mA) was carried out at room temperature with magnetic stirring until 3.0 F/mol of electricity was passed. After the electrolysis, the anodic solution was poured into dry  $\text{Et}_2\text{O}$  (10 mL). The resulting pale yellow precipitate was washed with dry  $\text{Et}_2\text{O}$  and dried under reduced pressure to afford  $[\text{Pd}(\text{CH}_3\text{CN})_4][\text{BF}_4]_2$  **1a** (26 mg, 58%).

**$[\text{Pd}(\text{CH}_3\text{CN})_4][\text{BF}_4]_2$  (1a):**  $^1\text{H}$  NMR (200 MHz,  $\text{CD}_3\text{NO}_2$ )  $\delta$  2.66 (s, 12H); IR (KBr) 2359, 2342, 1084  $\text{cm}^{-1}$ . Anal. Calcd for  $\text{C}_8\text{H}_{12}\text{B}_2\text{F}_8\text{N}_4\text{Pd}$ : C, 21.63; H, 2.72; N, 12.61. Found: C, 21.01; H, 2.76; N, 12.02.

**$[\text{Pd}(\text{CH}_3\text{CN})_4][\text{PF}_6]_2$  (1b):**  $^1\text{H}$  NMR (200 MHz,  $\text{CD}_3\text{NO}_2$ )  $\delta$  2.66 (s, 12H). IR (KBr) 2358, 2335, 2359  $\text{cm}^{-1}$ . Anal. Calcd for  $\text{C}_8\text{H}_{12}\text{F}_{12}\text{N}_4\text{P}_2\text{Pd}$ : C, 17.14; H, 2.16; N, 9.99. Found: C, 18.09; H, 2.64; N, 9.94.

**$[\text{Pd}(\text{CH}_3\text{CN})_4][\text{ClO}_4]_2$  (1c):**  $^1\text{H}$  NMR (200 MHz,  $\text{CD}_3\text{NO}_2$ )  $\delta$  2.67 (s, 12H); IR (KBr) 2361, 2334, 1143, 1109, 1089  $\text{cm}^{-1}$ .

---

(1) Yuan, J.-C.; Lu, S.-J. *Organometallics* **2001**, 20, 2697–2703.

(2) Sommer, R. D.; Rheingold, A. L.; Goshe, A. J.; Bosnich, B.; *J. Am. Chem. Soc.* **2001**, 123, 3940–3952.

### 3. Typical Procedure for Pd/TEMPO Double-Mediatory Electrooxidative Wacker-type Reaction

The anodic oxidation was carried out in an H-type divided cell equipped with two platinum electrodes ( $1.0 \times 1.5 \text{ cm}^2$ ). In the anodic chamber were placed 1-dodecene **2a** (85 mg, 0.5 mmol),  $\text{Pd}(\text{OAc})_2$  (12 mg, 0.05 mmol), and TEMPO (22 mg, 0.14 mmol) in 0.05 M  $\text{NaClO}_4$  solution of  $\text{CH}_3\text{CN}/\text{H}_2\text{O}$  (8.75/1.25 mL). In the cathodic chamber was placed 0.05 M  $\text{NaClO}_4$  solution of  $\text{CH}_3\text{CN}/\text{H}_2\text{O}$  (8.75/1.25 mL). The constant current electrolysis (5 mA) was carried out at room temperature with magnetic stirring until 3.0 F/mol of electricity was passed. To the resulting mixture was added aq sat. NaCl (5 mL) and extracted with EtOAc ( $3 \times 5 \text{ mL}$ ). The combined organic phase was washed with aq sat. NaCl (10 mL) and dried over  $\text{Na}_2\text{SO}_4$ . Removal of solvent under reduced pressure and subsequent column chromatography on silica gel afforded dodecan-2-one **3a** (76 mg, 82%) as colorless liquid.

**Dodecan-2-one (3a):**<sup>3</sup> Colorless liquid;  $^1\text{H}$  NMR (200 MHz,  $\text{CDCl}_3$ )  $\delta$  0.88 (t,  $J = 6.5 \text{ Hz}$ , 3H), 1.20–1.38 (m, 14H), 1.50–1.66 (m, 2H), 2.14 (s, 3H), 2.42 (t,  $J = 7.4 \text{ Hz}$ , 2H);  $^{13}\text{C}$  NMR (50 MHz,  $\text{CDCl}_3$ )  $\delta$  14.1, 22.7, 23.9, 29.2, 29.3, 29.40, 29.48, 29.55, 29.8, 31.9, 43.8, 209.2; IR (neat) 2925, 2854, 1718, 1466, 1411, 1359,  $1162 \text{ cm}^{-1}$ .

**Decan-2-one (3b):**<sup>4</sup> Colorless liquid;  $^1\text{H}$  NMR (200 MHz,  $\text{CDCl}_3$ )  $\delta$  0.88 (t,  $J = 6.6 \text{ Hz}$ , 3H), 1.20–1.36 (m, 10H), 1.50–1.64 (m, 2H), 2.14 (s, 3H), 2.42 (t,  $J = 7.4 \text{ Hz}$ , 2H);  $^{13}\text{C}$  NMR (50 MHz,  $\text{CDCl}_3$ )  $\delta$  14.1, 22.6, 23.9, 29.1, 29.2, 29.4, 29.8, 31.8, 43.8, 209.2; IR (neat) 2928, 2855, 1715, 1465, 1412, 1360,  $1163 \text{ cm}^{-1}$ .

**Undecan-2-one (3c):**<sup>5</sup> Colorless liquid;  $^1\text{H}$  NMR (200 MHz,  $\text{CDCl}_3$ )  $\delta$  0.88 (t,  $J = 6.4 \text{ Hz}$ , 3H), 1.20–1.38 (m, 12H), 1.50–1.64 (m, 2H), 2.14 (s, 3H), 2.42 (t,  $J = 7.3 \text{ Hz}$ , 2H);  $^{13}\text{C}$  NMR (50 MHz,  $\text{CDCl}_3$ )  $\delta$  14.0, 22.6, 23.8, 29.1, 29.2, 29.4, 29.7, 31.8, 43.7, 209.1; IR (neat) 2926, 2854, 1716, 1466, 1411, 1359,  $1162 \text{ cm}^{-1}$ .

**Tetradodecan-2-one (3d):** White solids;  $^1\text{H}$  NMR (200 MHz,  $\text{CDCl}_3$ )  $\delta$  0.88 (t,  $J = 6.5 \text{ Hz}$ , 3H), 1.20–1.36 (m, 18H), 1.50–1.64 (m, 2H), 2.13 (s, 3H), 2.42 (t,  $J = 7.4 \text{ Hz}$ , 2H);  $^{13}\text{C}$  NMR (50 MHz,  $\text{CDCl}_3$ )  $\delta$  14.1, 22.7, 23.9, 29.2, 29.3, 29.4, 29.5, 29.6, 29.8, 31.9, 43.8, 209.1; IR (KBr) 2917, 2849, 1712, 1464, 1414, 1376,  $1168 \text{ cm}^{-1}$ .

**Methyl 10-oxoundecanoate (3e):**<sup>6</sup> Colorless liquid;  $^1\text{H}$  NMR (200 MHz,  $\text{CDCl}_3$ )  $\delta$  1.24–1.34 (m, 8H), 1.50–1.66 (m, 4H), 2.13 (s, 3H), 2.30 (t,  $J = 7.5 \text{ Hz}$ , 2H), 2.42 (t,  $J = 7.4 \text{ Hz}$ , 2H), 3.67 (s, 3H);  $^{13}\text{C}$  NMR (50 MHz,  $\text{CDCl}_3$ )  $\delta$  23.8, 24.9, 29.0, 29.1, 29.8, 34.0, 43.7, 51.4, 174.1, 209.1; IR (neat) 2931, 2856, 1715, 1437, 1361,  $1171 \text{ cm}^{-1}$ .

**4-Phenylbutan-2-one (3f):**<sup>5</sup> Colorless liquid;  $^1\text{H}$  NMR (200 MHz,  $\text{CDCl}_3$ )  $\delta$  2.15 (s, 3H), 2.72–2.94 (m, 4H), 7.16–7.32 (m, 5H);  $^{13}\text{C}$  NMR (50 MHz,  $\text{CDCl}_3$ )  $\delta$  29.7, 30.0, 45.1, 126.0, 128.1, 128.3, 140.8,

(3) Tokuyasu, T.; Kunikawa, S.; Masuyama, A.; Nojima, M. *Org. Lett.* **2002**, *4*, 3595–3598.

(4) Ragagnin, G.; Betzemeier, B.; Quici, S.; Knochel, P. *Tetrahedron* **2002**, *58*, 3985–3991.

(5) Gerard, J.; Hevesi, L. *Tetrahedron* **2004**, *60*, 367–381.

(6) Schultz, S.; Toft, S., *Tetrahedron* **1993**, *49*, 6805–6820.

207.7; IR (KBr) 3062, 3028, 2925, 1717, 1603, 1496, 1453, 1409, 1358, 1162  $\text{cm}^{-1}$ .

**10-Oxoundecanal (3g):**<sup>7</sup> Colorless liquid;  $^1\text{H}$  NMR (200 MHz,  $\text{CDCl}_3$ )  $\delta$  1.24–1.36 (m, 8H), 1.50–1.68 (m, 4H), 2.13 (s, 3H), 2.42 (t,  $J = 7.4$  Hz, 4H), 9.76 (s, 1H);  $^{13}\text{C}$  NMR (50 MHz,  $\text{CDCl}_3$ )  $\delta$  22.0, 23.7, 29.0, 29.1, 29.8, 43.7, 43.8, 202.7, 209.1; IR (KBr) 2930, 2856, 2720, 1717, 1464, 1411, 1361, 1166  $\text{cm}^{-1}$ .

**4-Benzyloxybutan-2-one (3h):**<sup>8</sup> Colorless liquid;  $^1\text{H}$  NMR (200 MHz,  $\text{CDCl}_3$ )  $\delta$  2.18 (s, 3H), 2.72 (t,  $J = 6.3$  Hz, 2H), 3.74 (t,  $J = 6.3$  Hz, 2H), 4.51 (s, 2H), 7.29–7.37 (m, 5H);  $^{13}\text{C}$  NMR (50 MHz,  $\text{CDCl}_3$ )  $\delta$  30.4, 43.7, 65.1, 73.1, 127.5, 128.2, 137.9, 207.0; IR (neat) 3063, 3031, 2867, 1715, 1496, 1421, 1364, 1233, 1171, 1105  $\text{cm}^{-1}$ .

#### 4. Electrooxidation of Palladium Acetate in the Presence of TEMPO

The anodic oxidation was carried out in an H-type divided cell (glass filter) equipped with two platinum electrodes ( $1.5 \times 2.0 \text{ cm}^2$ ). In the anodic chamber was placed a solution of  $\text{Pd}(\text{OAc})_2$  (225 mg, 1.0 mmol) and TEMPO (469 mg, 3.0 mmol) in 0.1 M  $\text{Bu}_4\text{NBF}_4/\text{CH}_3\text{CN}$  (15 mL). In the cathodic chamber was placed 0.1 M  $\text{Bu}_4\text{NBF}_4/\text{CH}_3\text{CN}$  (15 mL). Under argon, the constant current electrolysis (10 mA) was carried out at room temperature with magnetic stirring until 2.4 F/mol of electricity was passed. After the electrolysis, to the combined solution of the anodic and cathodic chambers was added dry  $\text{Et}_2\text{O}$  (30 mL). The resulting pale yellow precipitate was washed with dry  $\text{Et}_2\text{O}$  and dried under reduced pressure to afford  $[\text{Pd}(\text{CH}_3\text{CN})_4(\text{tempo})][\text{BF}_4]$  (237 mg, 46%). IR (KBr) 3443, 2962, 2188, 1636, 1417  $\text{cm}^{-1}$ . Anal. Calcd for  $\text{C}_{17}\text{H}_{30}\text{BF}_4\text{N}_5\text{OPd}$ : C, 39.75; H, 5.89; N, 13.63. Found: C, 39.32; H, 5.54; N, 13.66.

---

(7) McMurry, J. E.; Silvestri, M. G.; Fleming, M. P.; Hoz, T.; Grayston, M. W. *J. Org. Chem.* **1978**, *43*, 3249–3255.

(8) Wabnitz, T. C.; Spencer, J. B. *Org. Lett.* **2003**, *5*, 2141–2144.
